# Supplementary material for: A New Product Development and Effect Analysis of Tinnitus Therapy Based on Pink Noise Tone
Source: Research Square preprint supplement (doi:10.21203/rs.3.rs-146522/v1), 2021-01-21
Supplement: Supplementary file 1 [file 0a6da10f8cf3c4490ed32e89.xlsx]

## Sheet: Sheet1
PatientID	DurationTinitus	AudiogramInfo	Tinnitus score (baseline)		Time post-fitting	Tinnitus score (post-fitting)		Feedback from clinicians and patients
			Severity	THI		（Last visit）
						Severity	THI
1	One year	Symmetrical mild to mod precipitous HL (audio included)	Severe	90	6 months	Mod Severe	66	If you have tinnitus when you relax, use Zen products; do well.
2	Years	Mild to mod sloping SNHL, bilaterally (audio included)	Moderate	42	6 months	Mild	32	I like to use Zen series for relaxation; the amplification function itself is enough.
3	Years	Symmetrical mild to severe sloping SNHL (audio included)	Moderate	44	Less 3 months	Moderate	38	Professional opera singers found Zen unreliable at first, but then he was conquered by Zen's sand type.
4	Tinnitus begins two years after head injury	RE - normal hearing sensitivity & LE - moderate flat SNHL	Severe	86	3 months	Mild	30	I like HA + Zen very much; it relieves tinnitus and helps to relax.
5	Tinnitus begins one year after injury	Normal to Severe High Freq SNHL	Moderate	50	3 months	Mild	24	I like Zen, but I don't wear it very often.
6	Began one year following onset of taking Lyrica	Mild-moderate sloping to SNHL bilaterally.	Mod Severe	66	Less 3 months	Moderate	52	HA and HA + noise series + Zen can help relieve tinnitus when awake.
7	2 years	Mild to mod sloping SNHL, bilaterally (audio included)	Mod Severe	76	Less 3 months	Mild	26	Tinnitus is not as obvious as it used to be.
8	over 20 years	mild, sloping to mod SNHL at 1000-8000 Hz AU	Moderate	50	Less 3 months	Moderate	44	I like to use hearing aids; although I have mild tinnitus, using hearing aids can relieve tinnitus symptoms.
11	2 weeks	RE. 60 dB flat loss, LE normal	Severe	86	6 months	Moderate	54	I like Zen very much; I always wear it.
13	Less than one year	Normal thru 3k，then mild to moderate SNHL	Profound	84	Less 3 months	Mild	28	Back to normal life, tinnitus became less obvious.
14	more than 2 years	mild thru 2k, then dropping precepitously to severe.	Severe	62	3 months	Mild	8	Changed life; incredible
15	Less than one year	mild to moderate SNHL	Mod Severe	60	6 months	Mild	24	Very good; relying on auxiliary equipment.
16	Almost 2 years	mild to severe predominantly SNHL	Mod Severe	72	3 months	Mild	28	Improper use of Zen and increased tinnitus.
17	3 years	mild to moderate high freq SNHL from 3k	Moderate	32	Less 3 months	Mild	20	Tinnitus is half done.
19		Mild to Severe SNHL (symmetric)	Profound	94	3 months	Never	12	Most of the time there is no tinnitus.
20	Almost 20 years	moderate predominatly SNHL	Moderate	46	Less 3 months	Mild	34	Like auxiliary facilities; tinnitus decreased.
21	8 years	Mild to mod-severe predominatly SNHL	Moderate	50	6 months	Mild	36	There is no tinnitus when wearing hearing aids.
22	29 years	Mild to Severe SNHL	Mild	34	Less 3 months	Mild	20	The tinnitus disappeared.
24	6 months	Both ears have mild to severe loss beginning at 4 kHz RT and after 8k left.	Mod Severe	74	6 months	Mild	28	The severity of tinnitus was minimized.
26	2 years	Asym. Left - mild HF notched. RT - mild to profound SNHL	Moderate	42	Less 3 months	Mild	30	Use neurology drugs to treat tinnitus, and hearing aids to assist hearing.
27	3 months following Chemo.	From 2 k mild to profound SNHL.	Profound	96	6 months	Mod Severe	62	Tinnitus decreased to 25-50%.
30	6 months	mod (45 dB), asymm CHL (RE>LE)	Profound	100	Less 3 months	Severe	84	Extremely upset at baseline, but better controlled after 3 weeks; much lighter, less anxious and upset.
31	Old tinnitus 20 years, new tinnitus 2 months	Bilateral mild to moderate sloping hearing loss (thresholds sent in email)	Mod Severe	74	3 months	Moderate	32	Unable to tolerate tinnitus at baseline; now let it go.
32	over 20 years	RE- Moderate SNHL LE- Sloping HFSNHL	Mod Severe	72	Less 3 months	Mod Severe	60	Start using Zen program, like to use auxiliary equipment.
34	years	Normal hearing to 1000 Hz, mild at 2000 Hz, moderate 4000 Hz and above	Moderate	52	Less 3 months	Moderate	44	Like Zen very much and use it often; it can help relieve stress and tension.
35	10 years	normal to borderline hearing	Severe	62	3 months	Moderate	8	At first, he was skeptical about Zen; his quality of life improved significantly; his feelings changed a lot since he put on the device.
36	10 years	Bilateral moderate-severe SNHL	Mod Severe	68	Less 3 months	Mild	28	Clinicians also have tinnitus themselves; the device does reduce tinnitus; Zen works wonders; lip reading reduces tinnitus and is relaxing.
37	3 months	Mild to severe high frequency sensorineural hearing loss starting at 2k	Mod Severe	62	Less 3 months	Moderate	42	330 was purchased for cost reasons.
38	15 years	Moderate bilateral SNHL	Moderate	48	6 months	Mild	24	With or without hearing aids, there's no tinnitus at all.
39	10 years	Bilateral severe SNHL	Mod Severe	76	3 months	Mild	34	The report says there was no help in the past; hearing aids and Zen now work well; there is no tinnitus at all.
40	25 years	Bilateral severe SNHL	Moderate	48	Less 3 months	Mild	32	It didn't help in the past; now he's free from the disturbing tinnitus.
41	10 years	Bilateral severe SNHL	Mod Severe	68	6 months	Moderate	48	Get relief from tinnitus treatment, but hate wearing hearing aids.
42	40 years, first became disturbing 15 years ago	Normal 250-1500, precipitously dropping to profound bilateral	Severe	66	Less 3 months	Mild	28	Zen is too soft; hearing allergy is greatly reduced; the effect is better after wearing hearing aids.
43	2 years	mild high frequency loss	Severe	98	6 months	Moderate	46	Hearing aids themselves help reduce tinnitus; use Zen only when quiet; like relaxing effects.
