# Supplementary material for: A New Product Development and Effect Analysis of Tinnitus Therapy Based on Pink Noise Tone
Source: Research Square preprint supplement (doi:10.21203/rs.3.rs-146522/v1), 2021-01-21
Supplement: Supplementary file 4 [file 698d043b0fd0ffd2cb80e526.docx]

**Table 1 Mean (M) and standard deviation (SD) of tinnitus disability assessment score before and after treatment**

| Score before treatment | | THI1 | | THI2 | | THI3 | |
| --- | --- | --- | --- | --- | --- | --- | --- |
| M | SD | M | SD | M | SD | M | SD |
| 65.6 | 19.0 | 38.8 | 16.9 | 22.7 | 10.4 | 42.0 | 15.5 |

**Table 2 Results of pared-samples T test: 1 month, 3 months and 6 months after the treatment**

|  | F | P |
| --- | --- | --- |
| THI 1 | 4.808 | 0.000 |
| THI 2 | 9.328 | 0.000 |
| THI 3 | 6.888 | 0.000 |
